# Meiotic crossover patterning in the absence of ATR: Loss of interference and assurance but not the centromere effect

Morgan M. Brady\*, Susan McMahan\*,<sup>†,‡,1</sup> and Jeff Sekelsky\*,<sup>†,‡,1</sup>

\*Curriculum in Genetics and Molecular Biology, <sup>†</sup>Department of Biology, <sup>‡</sup>Integrative Program in Biological and Genome Sciences, University of North Carolina, Chapel Hill, North Carolina 27599

**ABSTRACT** Meiotic crossovers must be properly patterned to ensure accurate disjunction of homologous chromosomes during meiosis I. Disruption of the spatial distribution of crossovers can lead to nondisjunction, aneuploidy, gamete dysfunction, miscarriage, or birth defects. One of the earliest identified genes involved proper crossover patterning is *mei-41*, which encodes the *Drosophila* ortholog of the checkpoint kinase ATR. Although analysis of hypomorphic mutants suggested the existence of crossover patterning defects, it has not been possible to assess these in null mutants because these mutants exhibit maternal-effect embryonic lethality. To overcome this lethality, we expressed wild-type Mei-41 only after the completion of meiotic recombination, allowing embryos to survive. We find that crossovers are decreased more severely in null mutants, to about one third of wild-type levels. Crossover interference, a patterning phenomenon that ensures that crossovers are widely spaced along a chromosome, is eliminated in these mutants. Similarly, crossover assurance, which describes the distribution of crossovers among chromosomes, is lost. Despite the loss of interference and assurance, a third important patterning phenomenon – the centromere effect – remains intact. We propose a model in which the centromere effect is established prior to and independently of interference and assurance.

**KEYWORDS** meiotic recombination, interference, centromere effect, *Drosophila*, ATR kinase

## Introduction

Meiotic crossovers are subject to numerous mechanisms of spatial control to ensure genetic diversity and proper disjunction of homologous chromosomes (Wang *et al.* 2015). Crossover assurance is the phenomenon in which there is at least one crossover per bivalent, generating the “obligate chiasma” that ensures disjunction (Owen 1949). Crossover interference is the inhibition of crossover formation within intervals flanking sites of crossover precursors (Sturtevant 1913; Berchowitz and Copenhagen 2010). Together with crossover homeostasis, which buffers crossover formation from increases or decreases in potential crossover precursors (Martini *et al.* 2006), assurance and interference demarcate the minimum and maximum number of crossovers

possible per meiosis. Modeling suggests that crossover assurance, interference, and homeostasis are the result of a single patterning process with varying degrees of plasticity depending on the meiotic environment (Wang *et al.* 2015). However, less is known regarding the centromere effect, a phenomenon wherein crossover formation is suppressed within pericentromeric euchromatic regions (Beadle 1932; Mather 1939).

Perturbation of crossover control can be viewed in the context of the two-pathway paradigm, wherein crossovers created within the ‘Class I’ pathway use canonical meiotic proteins that result in crossover patterning characteristic of that species (Kohl and Sekelsky 2013). Alternatively, in some cases mutants that lack one or more of these meiosis-specific proteins default back to a more mitotic-like ‘Class II’ pathway. This switch from Class I to Class II is often associated with a significant reduction in crossover formation and abnormal crossover patterning that results in gamete aneuploidy (Argueso *et al.* 2004; Lu *et al.* 2008; Hatkevich *et al.* 2017). Therefore, teasing apart the relationship between pathway usage and crossover control phenomena may

Copyright © 2017 by the Genetics Society of America

ORCID MMB: 0000-0002-1650-6167; JS: 0000-0002-4424-677X

Manuscript compiled: Monday 29<sup>th</sup> May, 2017%

<sup>1</sup>Corresponding Author: 303 Fordham Hall, Department of Biology, University of North Carolina, Chapel Hill, NC 27599-3280. E-mail: sekelsky@unc.edu

help elucidate evolutionarily conserved mechanisms resulting in proper crossover placement.

The *Drosophila mei-41* gene, originally identified in a screen for meiotic mutants in 1972, encodes the ortholog of the DNA damage checkpoint kinase ATR (Baker and Carpenter 1972; Hari *et al.* 1995). Progeny from *mei-41*<sup>1</sup> females exhibited altered crossover distribution, suggesting a critical role for the protein in meiotic crossover patterning (Baker and Carpenter 1972). However, meiotic recombination has not been assayed in the complete absence of Mei-41 because null mutants exhibit maternal-effect embryonic lethality due to DNA replication checkpoint failure: Embryos that lack maternal Mei-41 fail to slow rapid nuclear cycles leading up to the midblastula transition, do not cellularize, and eventually degenerate (Sibon *et al.* 1999). Thus, alleles used in previous studies of meiotic recombination are either hypomorphic or separation-of-function (Laurençon *et al.* 2003).

To overcome the embryonic requirement for maternal Mei-41, we expressed Mei-41 under control of a promoter that turns on during oogenesis after recombination has been completed, generating a fertile *mei-41* null mutant. Crossover and non-disjunction phenotypes are more severe in the *mei-41* null mutant. With regard to crossover patterning, crossover interference and assurance are completely lost in *mei-41* null mutants, but the centromere effect remains intact. Intriguingly, progeny from mothers lacking both Mei-41 and the presumed *Drosophila* Class I Holliday junction resolvase Mei-9 have phenotypes nearly identical to those of *mei-41* single mutants, indicating a switch to the Class II pathway following the establishment of the centromere effect. We conclude that the centromere effect is established prior to, or separate from, the essential role of Mei-41 in the Class I crossover pathway and that the centromere effect is achieved independently of interference and assurance.

## Materials and Methods

### *Drosophila* stocks

Flies were maintained at 25° on standard medium. To overcome the maternal-effect embryonic lethality of *mei-41*<sup>29D</sup> null mutation (Sibon *et al.* 1999; Laurençon *et al.* 2003), wild-type genomic *mei-41* was cloned into the pPattB, UASp::w vector (courtesy of Steve Rogers) via In-Fusion HD (Takara Bio USA, Inc., Mountain View, CA) and transformed into XL10-Gold ultracompetent cells (Agilent Technologies, Inc., Santa Clara, CA). This construct was injected via phiC31 integrase-mediated transgenesis into the X chromosome landing site 2A (BestGene Inc., Chino Hills, CA). Integrants were crossed into a P{*matα4::GAL4-VP16*} background. *w mei-41*<sup>29D</sup>/y P{UASp::*mei-41*} *w mei-41*<sup>29D</sup>; *matα4::GAL4-VP16*/+ was used in all *mei-41* null assays.

Double mutant stock creation used the above transgenic rescue in conjunction with appropriate null alleles. The *mei-41*; *mei-P22* double mutant genotype was *y w mei-41*<sup>29D</sup>/y P{UASp::*mei-41*} *w mei-41*<sup>29D</sup>; *mei-P22*<sup>103</sup> *st/mei-P22*<sup>103</sup> *Blm*<sup>D2</sup> *Sb* P{*matα4::GAL4-VP16*}. The *mei-9 mei-41* double mutant genotype was *y mei-9<sup>a</sup> mei-41*<sup>29D</sup>/y P{UASp::*mei-41*} *w mei-9<sup>a</sup> mei-41*<sup>29D</sup>; P{*matα4::GAL4-VP16*}/+. The *mei-41 Blm* double mutant genotype was *w mei-41*<sup>29D</sup>/y P{UASp::*mei-41*} *w mei-41*<sup>29D</sup>; *st Blm*<sup>D2</sup> *ry*<sup>531</sup> P{*matα4::GAL4-VP16*}/*Blm*<sup>N1</sup> *ry*<sup>606</sup> *Sb* P{UASp::*Blm*}.

### Hatch rates

To test P{UASp::*mei-41*} rescue efficiency, 60 virgin females of appropriate genotypes were crossed to 20 isogenized Oregon-Rm males (courtesy of Scott Hawley). Adults were mated in grape-juice agar cages containing yeast paste for two days prior

to collection. Embryos were collected on grape-juice agar plates for five hours and scored for hatching 48 hours later.

### Meiotic assays

Meiotic crossovers were quantified by crossing *net dpp*<sup>d-ho</sup> *dp b pr cn* / + virgin females of the appropriate mutant background to *net dpp*<sup>d-ho</sup> *dp b pr cn* males. All six markers were scored in progeny from each genotype, with the exception *mei-41*; *mei-P22*. In that case, 731 XX females were scored for all six markers and 1023 XXY females and XY males were scored for *net - b*; eye color markers *pr* and *cn* were excluded because of the presence of a *w* mutation in the mothers. These data were pooled for a final *n* of 1754. Crossover density was calculated using *Drosophila melanogaster* reference genome release 6.12 with transposable elements excluded, as described in Hatkevich *et al.* (Hatkevich *et al.* 2017). Complete progeny counts are given in Supplemental Table S1.

Interference was assayed by crossing *dp wg*<sup>Sp-1</sup> *b* / + virgin *mei-41* null and wild-type females to *net dpp*<sup>d-ho</sup> *dp b pr cn* males. Complete progeny counts are given in Supplemental Table S2.

X nondisjunction was scored by crossing virgin mutant females of the appropriate genotypes to *y sc cv v gf* / *Dp(1;Y)B*<sup>S</sup> males. Exceptional progeny for X nondisjunction events originate from diplo-X and nullo-X ova, resulting in Bar-eyed females (XXY) and wild-type-eyed males (XO), respectively. Counts of scored exceptional progeny were multiplied by two to account for X nondisjunction progeny that do not survive to adulthood (XXX and YO).

### *mei-41*; *Blm* double mutant morphology analysis

*mei-41*; *Blm* double mutant females reach adulthood at less than expected Mendelian ratios relative to sibling classes, scored over a five day period. Double mutants and wild-type virgins were mated to isogenized *w*<sup>1118</sup> males for two days in vials containing yeast paste, followed by ovary dissection in PBS buffer. Female morphology and ovary defects were photographed using the EOS Rebel T3i (Canon U.S.A., Inc., Long Island, NY) with an MM-SLR Adapter (Martin Microscope Company, Easley, SC).

### Data Availability

The authors state that all data necessary for confirming the conclusions presented in the article are represented fully within the article. *Drosophila* stocks are available upon request.

## Results

### Post-germarium expression of *mei-41* rescues embryonic lethality and creates a meiotic recombination null

*Drosophila* females homozygous for null mutations in *mei-41* produce no viable progeny due to a requirement for maternally-deposited Mei-41 at the midblastula transition, resulting in cleavage-stage arrest (Sibon *et al.* 1999). *Blm* null mutants also exhibit maternal-effect embryonic lethality (McVey *et al.* 2007). To study meiotic recombination in *Blm* null mutants, Kohl *et al.* (Kohl *et al.* 2012) expressed wild-type *Blm* under indirect control of the alpha tubulin 67C (*matα*) promoter via the Gal4-UASp system. This promoter does not express until the early vitellarium (Sanghavi *et al.* 2013), by which time recombination should be complete. In support of this conclusion, crossover assays on surviving progeny of females with null mutations in *Blm* give similar results to those from embryos rescued by expressing

*UASp::Blm* with the *matα4::GAL4-VP16* driver (McVey *et al.* 2007; Kohl *et al.* 2012; Hatkevich *et al.* 2017).

We used the same system to overcome the maternal-effect lethality in embryos from *mei-41<sup>29D</sup>* homozygous null females (see Materials and Methods). To quantify the extent of maternal  $P\{UASp::mei-41\}$  rescue, we compared hatch rates of embryos from wild-type, *mei-41<sup>29D</sup>*, and  $P\{UASp::mei-41\}$  *mei-41<sup>29D</sup>* with and without  $P\{matα4::GAL4-VP16\}$  (Table 1). Embryos from females homozygous for *mei-41<sup>29D</sup>* with or without  $P\{UASp::mei-41\}$  but lacking  $P\{matα4::GAL4-VP16\}$  did not survive to hatching, whereas embryos from females with both components of the Gal4-*UASp* rescue system had a hatch rate of 52.8%. It is possible that the rescue is complete and that the remaining embryonic lethality is due to aneuploidy resulting from high nondisjunction in *mei-41* mutants. Larvae that did hatch survived to adulthood, allowing for analysis of the crossover patterning landscape in a *mei-41* null mutant. For simplicity, flies carrying this transgene system are denoted below as *mei-41<sup>29D</sup>* or *mei-41* null mutants.

### Crossover reduction in *mei-41* null mutants

*Drosophila mei-41* was initially characterized as a meiotic mutant by Baker and Carpenter in 1972 (Baker and Carpenter 1972). Hypomorphic *mei-41* alleles resulted in an overall 46% decrease relative to wild-type controls, measured across adjacent intervals spanning the entirety of 2L and proximal 2R, about 20% of the euchromatic genome. Progeny from *mei-41<sup>29D</sup>* mothers had a significantly more severe phenotype, with a 67% reduction in crossovers summed across this region (Figure 1A). Given the many functions of Mei-41 in mitotically proliferating cells, we wanted to determine whether the remaining crossovers were meiotic or occurred within the pre-meiotic germline. Mei-P22 is the binding partner of Mei-W68, the *Drosophila* Spo11 ortholog, and is required to generate meiotic DSBs (Liu *et al.* 2002; Robert *et al.* 2016). In the absence of Mei-P22, resulting crossovers must be mitotic in origin and occur prior to meiotic recombination. *Drosophila* males hemizygous for *mei-41<sup>29D</sup>* do not display mitotic recombination in the pre-meiotic germline (LaRocque *et al.* 2007). Likewise, meiotic crossovers were completely abolished in *mei-41<sup>29D</sup>; mei-P22<sup>103</sup>* double mutants ( $n = 1754$ ). One vial had two female progeny that appeared to be either a double crossover in the adjacent *b - pr* and *pr - cn* regions, gene conversion of the *pr* mutation, or reversion of this mutation (an insertion of a 412 transposable element). Since these were in the same vial they likely represent a single pre-meiotic event. We conclude that the crossovers observed in the *mei-41* null mutant females are meiotic in origin.

### Crossover interference and crossover assurance are lost in *mei-41* null mutants

Meiotic crossover control includes a phenomenon known as interference, which is a decreased likelihood of having two crossovers close to each other within the same chromosome arm (Sturtevant 1913; Berchowitz and Copenhaver 2010). While the strength of crossover interference differs between organisms, complete interference in *Drosophila* extends out to about 10 cM (Weinstein 1958). Baker and Carpenter (Baker and Carpenter 1972) reported that interference is reduced in *mei-41* hypomorphic mutants. We determined the extent of this reduction in null mutants by analyzing two adjacent intervals on 2L (Figure 2A). Single and double crossovers were scored and interference (*I*) was calculated using the method of Stevens (Stevens 1936). In Stevens' definition,  $I = 1$  indicates complete positive inter-

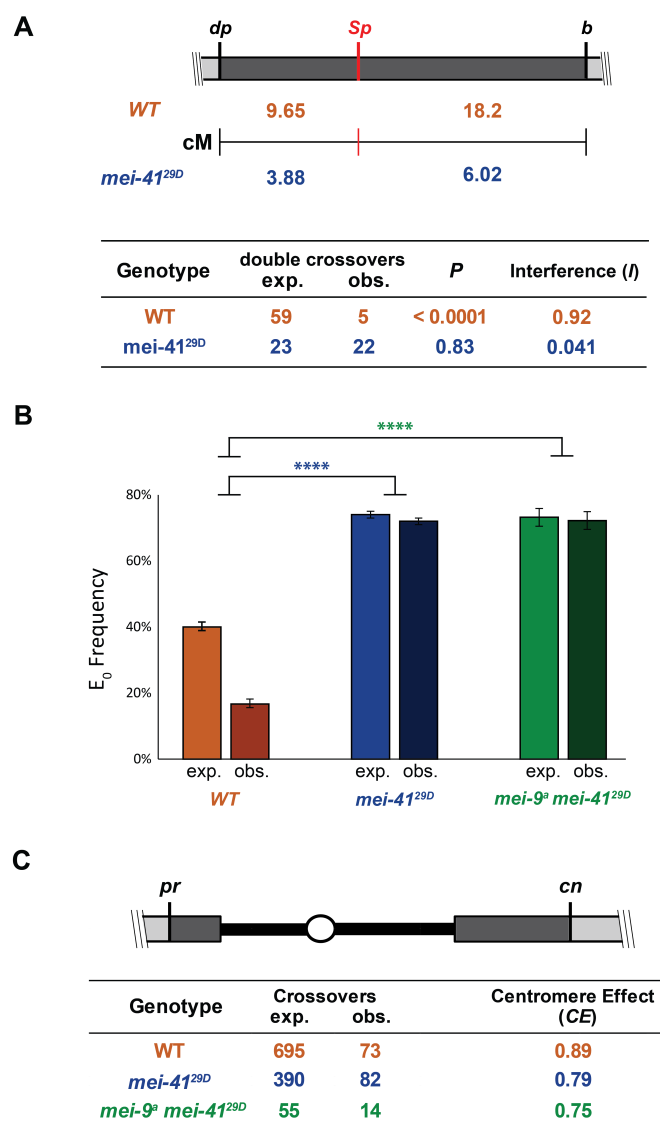

**Figure 1** Crossover reduction in *mei-41* null mutants. (A) Crossover distribution on 2L in *mei-41<sup>29D</sup>* mutants compared to wild-type. Marker location indicated at top based on genome assembly position (Mb) and excludes the centromere and unassembled peri-centromeric satellite sequences (black circle). Crossover density (solid line) scored between each marker for wild-type flies ( $n = 4222$ ) and *mei-41* mutants ( $n = 7801$ ). Mean density (dashed line) shows overall crossover reduction across all intervals. Statistical significance determined via chi-square tests on crossovers observed versus crossovers expected if crossovers are a reflection of mean density (ns,  $p > 0.05$ ; \*\*,  $p < 0.01$ ; \*\*\*\*,  $p < 0.0001$  after Bonferroni correction; †  $p < 0.0001$  after G test of goodness of fit of overall *mei-41<sup>29D</sup>* crossover distribution compared to wild-type). Wild-type data are from Hatkevich *et al.* (Hatkevich *et al.* 2017) (used with permission). (B) Genetic length (cM) for 2L in wild-type and *mei-41<sup>29D</sup>*. Marker location indicated at bottom based on genetic length. Numbers represent cM for each interval. For the full dataset, refer to Supplemental Table 1.

**Table 1 Hatch rates for embryos from *mei-41* mutants.**

| Maternal Genotype                                                            | Hatched (%)       | Total ( <i>n</i> ) |
|------------------------------------------------------------------------------|-------------------|--------------------|
| wild type                                                                    | 73.1 <sup>a</sup> | 2035               |
| <i>mei-41</i> <sup>29D</sup>                                                 | 0                 | 527                |
| <i>P{UASp::mei-41} mei-41</i> <sup>29D</sup>                                 | 0                 | 837                |
| <i>P{UASp::mei-41} mei-41</i> <sup>29D</sup> ; <i>P{matα4::GAL4VP16} / +</i> | 52.8 <sup>b</sup> | 1187               |

<sup>a</sup> This number is lower than expected for wild type. The cause of this is unknown.

<sup>b</sup> The apparent lack of complete rescue may largely be the result of a high frequency of aneuploidy resulting from the absence of *mei-41* during meiotic recombination.

ference and  $I = 0$  indicates no interference. Among progeny of wild-type females ( $n = 3325$ ), there are significantly fewer double crossovers observed (5) than expected (59;  $p < 0.0001$ ), demonstrating strong interference between these intervals ( $I = 0.915$ ; Figure 2A). Compared to wild-type, *mei-41*<sup>29D</sup> mutants ( $n = 9740$ ) show a significant reduction in interference ( $p < 0.0001$ ; Figure 2A), with no significant difference between expected (23) and observed (22) ( $p = 0.83$ ;  $I = 0.041$ ; Figure 2A). Based on this, we conclude that interference is completely lost in *mei-41* null mutants.

Meiotic crossover reduction in *Drosophila* leads to an increase in nondisjunction events, often due to a failure to form at least one crossover (known as the obligate chiasma) between homologs (Hawley 1988; Koehler *et al.* 1996). These observations imply the existence of a mechanistic phenomenon known as crossover assurance, where bivalents must achieve a minimum number of crossovers to create the meiotic spindle tension required for stable homolog orientation at metaphase I (McKim *et al.* 1993). X chromosome nondisjunction occurs at a frequency of less than 0.1% in wild-type *Drosophila*, and original hypomorphic alleles of *mei-41* cause a significant increase, to 9-10% (Baker and Carpenter 1972). We crossed *mei-41*<sup>29D</sup> females to males carrying a dominant Y-linked *B*<sup>S</sup> mutation and scored progeny. NDJ was significantly increased relative to the rate in hypomorphic mutants (13.6%;  $p = 0.0018$ ) (Supplementary Table 3).

Based on the loss of interference, the severe reduction in crossovers per meiosis, and the significant increase in X nondisjunction seen in *mei-41* null mutants, we hypothesized that crossover assurance would be severely reduced, if not completely lost. If the reduction in crossovers on 2L is representative of the entire genome, then *mei-41* null mutants average less than two crossovers per meiosis. It is therefore not possible to have full assurance, which would require a minimum of three (one per major chromosome) or five (one per major chromosome arm) crossovers. Nonetheless, assurance could manifest as the two crossovers being on different chromosomes more often than expected by chance. This would predict a decrease in double crossovers; since we observed no such decrease (Figure 2A) it suggests that crossover assurance is indeed lost.

We also assessed assurance by comparing the observed and expected frequency of meioses in which there were no crossovers ( $E_0$ ) on 2L. For *mei-41*<sup>29D</sup> mutants the expected  $E_0$  frequency (0.740, based on Poisson distribution) is similar to the observed  $E_0$  frequency (0.720, based on the equations of Weinstein (Weinstein 1936)). This differs significantly compared to wild-type females ( $p < 0.0001$ ) (Figure 2B). Together, the significant increase in X chromosome nondisjunction, the loss of interference,

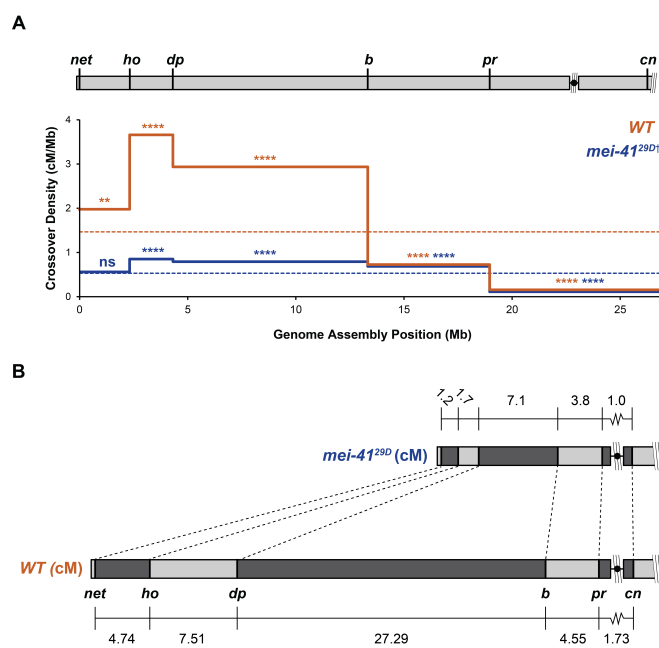

**Figure 2** Distal meiotic crossovers are reduced in *mei-41* null mutants. (A) Crossover distribution on 2L in *mei-41*<sup>29D</sup> mutants compared to wild-type. Marker location indicated at top based on genome assembly position (Mb) and excludes the centromere and unassembled peri-centromeric satellite sequences (black circle). Crossover density (solid line) scored between each marker for wild-type flies ( $n = 4222$ ) and *mei-41* null mutants ( $n = 7801$ ). Mean density (dashed line) shows overall crossover reduction across all intervals. Statistical significance determined via chi-square tests on crossovers observed versus crossovers expected if crossovers are a reflection of mean density (ns,  $p > 0.05$ ; \*\*,  $p < 0.01$ ; \*\*\*\*,  $p < 0.0001$  after Bonferroni correction; †  $p < 0.0001$  after G test of goodness of fit of overall *mei-41*<sup>29D</sup> crossover distribution compared to wild-type). Wild-type data are from Hatkevich *et al.* (Hatkevich *et al.* 2017) (used with permission). (B) Genetic length (cM) for 2L in wild-type and *mei-41*<sup>29D</sup>. Marker location indicated at bottom based on genetic length. Numbers represent cM for each interval. For the full dataset, refer to Supplemental Table 1.



and the  $E_0$  frequency indicate that crossover assurance is lost in *mei-41<sup>29D</sup>* mutants.

### The centromere effect is retained in *mei-41* mutants

A striking observation from both *mei-41<sup>1</sup>* and *mei-41<sup>29D</sup>* mutants is that despite significant reduction in medial and distal crossovers, a proportional reduction in the number of crossovers within the proximal regions is not seen. As in hypomorphic mutants, crossover reduction in *mei-41* null mutants was more severe within the three distal intervals (>70% reduction in each) compared to the two proximal intervals (15% for *b* to *pr* and 29% for *pr* to *cn*, which spans the pericentric heterochromatin) (Figure 1B). This suggests that the centromere effect on recombination remains intact despite severe reduction or complete loss of crossover interference and assurance. To evaluate this hypothesis in *mei-41* null mutants, we calculated *CE*, a measure of the centromere effect that is similar to *I* (Hatkevich *et al.* 2017), in the centromere-spanning *pr - cn* interval. As in wild-type females ( $CE = 0.89$ ; (Hatkevich *et al.* 2017), in *mei-41<sup>29D</sup>* mutants there was a significant difference between expected and observed crossovers in this region ( $p < 0.0001$ ), yielding a *CE* value of 0.79 (Figure 2C).

### Crossovers in *mei-41* mutants are not dependent upon the Class I meiotic resolvase *Mei 9*

The change in crossover distribution seen in *mei-41* null mutants differs from patterning seen in *Blm* mutants, which encodes a helicase required for proper meiotic patterning and recombination through the Class I pathway (Hatkevich *et al.* 2017). Loss of *Blm* results in loss of interference, assurance, and the centromere effect. These crossovers are generated in the Class II pathway as they do not use the Class I resolvase *Mei 9*, suggesting that *Blm* helicase is required for shuttling meiotic DSBs into the Class I pathway early in the repair pathway, and that there is no patterning in the Class II pathway.

As *mei-41<sup>29D</sup>* null mutants lose crossover assurance and interference but retain the centromere effect, we hypothesized that loss of *Mei-41* shifts meiotic recombination into the Class II pathway later than loss of *Blm*, after establishment of the centromere effect. To determine whether crossovers generated in *mei-41* null mutants rely upon the Class I resolvase, we generated *mei-9<sup>a</sup> mei-41<sup>29D</sup>* double mutants and analyzed crossover patterning on 2L as described above. Similar to *mei-41<sup>29D</sup>* single mutants, double mutants displayed a 66% reduction in crossovers and exhibited a similar same distribution. (Figure 3A & 3B). Consistent with this, nondisjunction frequency in the *mei-9 mei-41* double mutant (15.9%,  $p = 0.3424$ ) was not significantly different to that of the *mei-41* single mutant (Supplementary Table 2) and crossover assurance was lost ( $p = 0.488$ ; Figure 22A). Most importantly, the centromere effect in double mutants ( $CE = 0.75$ ) was similar to that of *mei-41* single mutants, with a significant difference between expected and observed crossovers ( $p < 0.0001$ ; Figure 2C). We conclude that crossovers generated in *mei-41* mutants do not require the Class I *Mei-9* resolvase, suggesting that loss of *Mei-41* shifts meiotic recombination into the Class II pathway after or separate from the establishment of the centromere effect.

### *mei-41*; *Blm* double mutants display partial synthetic lethality and low brood size

To further tease apart the establishment of crossover control mechanisms in the context of the two-pathway paradigm, we

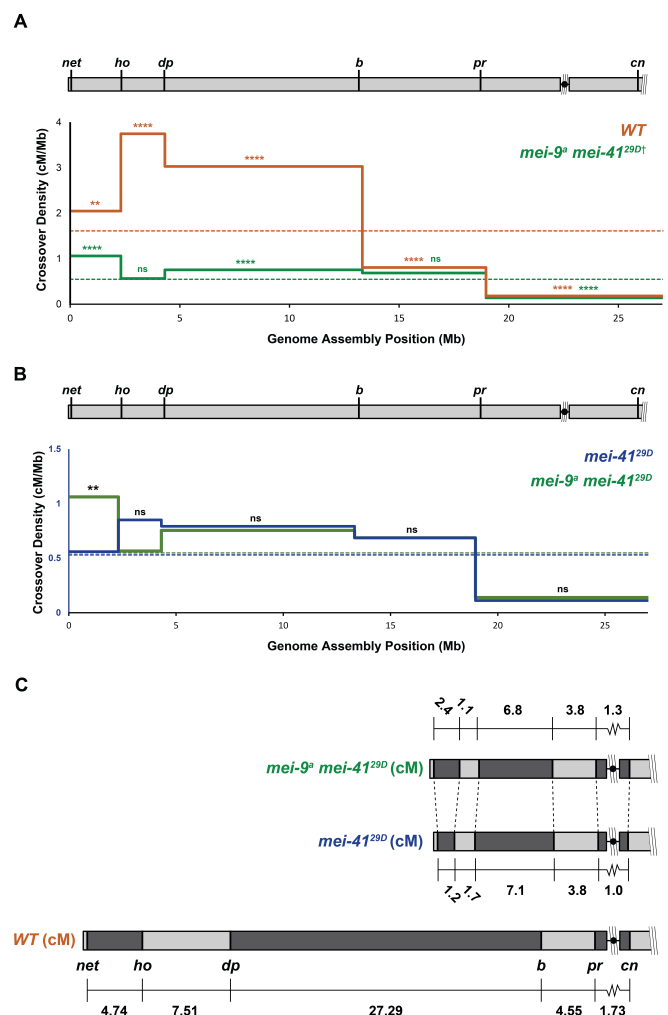

**Figure 3** Crossover patterning in *mei-9<sup>a</sup> mei-41<sup>29D</sup>* double mutant similar to *mei-41<sup>29D</sup>* single mutant. (A) Crossover distribution on 2L in *mei-9<sup>a</sup> mei-41<sup>29D</sup>* compared to previous wild-type data (Hatkevich *et al.* 2017), used with permission. For schematic explanation and statistical calculations refer to Figure 1A (*mei-9<sup>a</sup> mei-41<sup>29D</sup>*  $n = 1059$ ). (B) Comparison of crossover distribution between single and double mutant. Statistical significance determined for each interval via chi-square tests between expected crossovers (*mei-41<sup>29D</sup>*) and observed crossovers (*mei-9<sup>a</sup> mei-41<sup>29D</sup>*) (ns,  $p > 0.05$ ; \*\*  $p < 0.01$ ). Only the most distal region (*net* to *ho*) is significantly different between single and double mutants, but it is unclear whether this is biologically meaningful or merely a consequence of low sample size or genetic background effects. (C) Genetic length (cM) comparison for 2L in *mei-41<sup>29D</sup>* versus *mei-9<sup>a</sup> mei-41<sup>29D</sup>* double mutants. Wild-type genetic length included below for marker reference. Numbers represent cM for each interval. For the full dataset, refer to Supplemental Table 1.

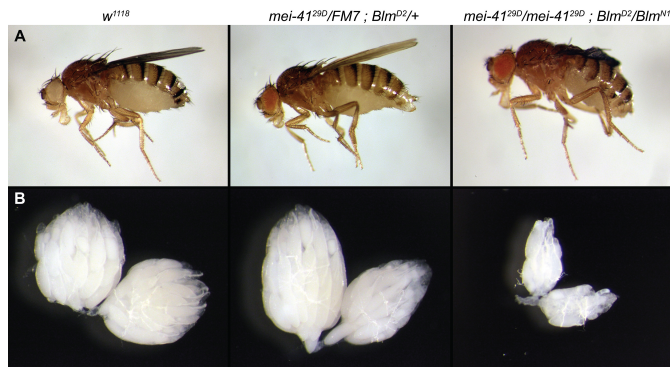

**Figure 4** *mei-41*<sup>29D</sup>; *Blm* double mutants display morphological abnormalities and underdeveloped ovaries at six days post-eclosion. (A) Morphological differences between control, heterozygous, and homozygous female adults (genotypes listed at top). Of adult who survived to six days post-eclosion, control and heterozygous females display wild-type morphology, while double mutant females show abnormal tergites. (B) Ovaries from control and heterozygous appear wild-type, while ovaries from double mutant females are severely underdeveloped, resulting in low brood size.

hypothesized that *Blm* acts earlier in the recombination pathway than *Mei-41*, since there is a complete loss of crossover patterning in *Blm* mutants compared to loss of only interference and assurance in *mei-41* mutants. Therefore, *mei-41*; *Blm* double mutants should have a phenotype like that of *Blm* single mutants with respect to crossover patterning. However, while both *mei-41* and *Blm* single mutants are fully viable, we recovered fewer *mei-41*; *Blm* double mutant females than expected, suggesting partial synthetic lethality. Of the few obtained, females exhibited underdeveloped abdomens and abnormal tergites (Figure 4A). Most lacked midgut and hindgut structures, displayed ovary epithelial sheaths that contained under-developed ovaries or lacked ovaries entirely, and died within 1-2 days of eclosion. Survivors retained underdeveloped ovaries at six days post-eclosion (Figure 4B), corresponding to a severe reduction in brood size and making crossover and nondisjunction analyses impractical. These synthetic phenotypes (reduced viability and developmental defects) are likely the result of a combination of mitotic defects seen in *mei-41* and *Blm* single mutants, which include elevated spontaneous apoptosis (LaRocque *et al.* 2007; Trowbridge *et al.* 2007).

## Discussion

We have demonstrated that the Gal4-*UASp* rescue successfully overcomes maternal-effect embryonic lethality of *mei-41* mutants, allowing us to perform meiotic crossover patterning analysis in *mei-41* null mutants. The crossover reduction in null mutants is more severe than that of the previously reported for hypomorphic mutant (Baker and Carpenter 1972). Importantly, we found that crossover interference and assurance are abolished when *Mei-41* is absent, yet the centromere effect remains largely intact. Removing the presumptive Class I meiotic resolvase (*Mei-9*) in a *mei-41* null background resulted in phenotypes similar to those of the *mei-41* single mutant, suggesting that meiosis in *mei-41* null mutants relies on alternative endonucleases to resolve recombination intermediates into crossovers. These crossovers might therefore be defined as being made through the Class II pathway (Kohl and Sekelsky 2013).

Crossovers also appear to be made through the Class II pathway in *Drosophila Blm* mutants (Hatkevich *et al.* 2017). In these mutants, crossover distribution is more-or-less random along and between chromosomes, perhaps reflecting DSB distribution. Notably, interference, assurance, and the centromere effect are all severely decreased or lost entirely. In contrast, in *mei-41* mutants we find that interference and assurance are lost but a strong centromere effect is retained. If crossover interference and crossover assurance result from a single patterning process (Wang *et al.* 2015), it is not surprising to see loss of both. Retention of a centromere effect, however, suggests a mechanism that is separate from these other patterning phenomena.

The molecular function of *Mei-41* that impacts crossover patterning is unknown. One parsimonious interpretation of our results is that the centromere effect is established prior to crossover interference and assurance (Figure 5). *Blm* is required before any of these processes occurs, so loss of *Blm* results in loss of all three. *Mei-41*, however, is required later, after the centromere effects has been established but before interference and assurance are achieved. In mice, ATR localizes to unsynapsed chromosome axes (Keegan *et al.* 1996). Immunolocalization of *Mei-41* has not been reported, but in *Drosophila* synapsis is not dependent on DSBs (McKim *et al.* 1998), and both synapsis and DSB formation appear to be normal in *mei-41* mutants (Carpenter 1979; Joyce *et al.* 2011). The budding yeast ortholog of ATR, *Mec1*, is required to ensure inter-homolog bias during meiotic recombination (Grushcow *et al.* 1999). Use of the sister chromatid could disrupt the Class I pathway and reduce the number of interhomolog crossovers, resulting in part or all of the observed decrease. In mitotic DSB repair, *mei-41* mutants have no observable defects in the early steps of SDSA, such as resection, strand invasion, and synthesis, but required for subsequent annealing and ligation (LaRocque *et al.* 2007). The molecular function of *Mei-41* in mitotic DSB repair has not been elucidated, but it has been hypothesized that *Mei-41* activates *Marcal1*, which then catalyzes annealing of complementary sequences (Holsclaw and Sekelsky 2017). It is possible that *Mei-41* activates a protein that catalyzes 2nd-end capture during meiosis, and that loss of this activity prevents recombination from proceeding through the Class I crossover pathway. Assays for sister chromatid exchange and analyses of heteroduplex DNA may shed additional light on the mechanistic role(s) of *Mei-41* during meiosis.

Perhaps the most interesting outcome of this work is that the centromere effect is established separately from crossover interference and crossover assurance. The beam-film model postulates that the establishment of crossover interference relies on relief of axial mechanical stress outwards from sites of crossover designation, with crossover homeostasis buffering this spreading inhibitory region based on crossover precursor density (Kleckner *et al.* 2004; Zhang *et al.* 2014). Crossover assurance is therefore observable as the passive byproduct of proper crossover-designation resolution, suggesting that interference, assurance, and homeostasis result from a single patterning process (Zhang *et al.* 2014; Wang *et al.* 2015). We suggest that the centromere effect is achieved through an independent process. Whole-genome sequencing reveals that noncrossover gene events are as common in proximal regions as in other regions, suggesting that DSBs are made throughout the euchromatin (Comeron *et al.* 2012; Miller *et al.* 2016). This implies that the centromere effect is achieved by directing repair of proximal DSBs preferentially into noncrossover pathways or preventing them from entering the crossover pathway. Analysis of recom-

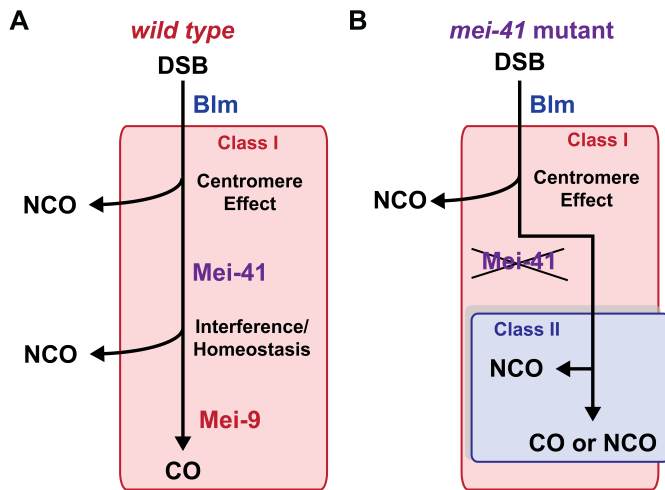

**Figure 5** Model for Mei-41 function relative to crossover patterning. (A) Crossovers (CO) in wild-type flies are produced by the Class I pathway (red box). Blm helicase activity is required for entry into the Class I pathway, and therefore for all crossover patterning. The centromere effect is established prior to Mei-41 function, resulting in most proximal DSBs being repaired as noncrossovers (NCO). Mei-41 functions prior to establishment of crossover interference and homeostasis. (B) In the absence of Mei-41, DSBs enter the Class I pathway and the centromere effects is enforced; however, the absence of Mei-41 blocks further progression in this pathway. Instead, repair is completed through the Class II pathway. This may involve formation of noncrossovers through SDSA or dHJ dissolution, or it may involve unbiased resolution of dHJs by an unknown mitotic resolvase to produce either crossover or noncrossover products. The crossovers that are produced are not patterned, except for the centromere effect.

bination in triploid females suggests that the centromere effect might be sensitive to the number of centromeres (Redfield 1932; Sturtevant 1951; Hartmann and Sekelsky 2017), but there is really nothing else known about mechanism. Additional experiments to understand the function of Mei-41 in meiotic recombination may also provide insights into the mechanism of the centromere effect.

## Acknowledgements

We thank Nicole Crown, Michaelyn Hartmann, and Talia Hatkevich for comments on the manuscript. This work was supported by a grant from the National Institute of General Medical Sciences (NIGMS) to JS under award 1R35GM118127.

## Literature Cited

Argueso, J. L., J. Wanat, Z. Gemici, and E. Alani, 2004 Competing crossover pathways act during meiosis in *saccharomyces cerevisiae*. *Genetics* **168**: 1805–1816.

Baker, B. S. and A. T. C. Carpenter, 1972 Genetic analysis of sex chromosomal meiotic mutants in *drosophila melanogaster*. *Genetics* **71**: 255–286.

Beadle, G. W., 1932 A possible influence of the spindle fibre on crossing-over in *drosophila*. *Proc Natl Acad Sci U S A* **18**: 160–5.

Berchowitz, L. E. and G. P. Copenhaver, 2010 Genetic interference: don't stand so close to me. *Curr Genomics* **11**: 91–102.

Carpenter, A. T. C., 1979 Recombination nodules and synaptonemal complex in recombination-defective females of *drosophila melanogaster*. *Chromosoma* **75**: 259–292.

Comeron, J. M., R. Ratnappan, and S. Bailin, 2012 The many landscapes of recombination in *drosophila melanogaster*. *PLoS Genet* **8**: e1002905.

Grushcow, J. M., T. M. Holzen, K. J. Park, T. Weinert, M. Lichten, and D. K. Bishop, 1999 *Saccharomyces cerevisiae* checkpoint genes *mecl1*, *rad17* and *rad24* are required for normal meiotic recombination partner choice. *Genetics* **153**: 607–20.

Hari, K. L., A. Santerre, J. Sekelsky, K. S. McKim, J. B. Boyd, and R. S. Hawley, 1995 The *mei-41* gene of *d. melanogaster* is a structural and functional homolog of the human ataxia telangiectasia gene. *Cell* **82**: 815–821.

Hartmann, M. A. and J. Sekelsky, 2017 The absence of crossovers on chromosome 4 in *drosophila melanogaster*: Imperfection or interesting exception? *Fly (Austin)* pp. 1–7.

Hatkevich, T., K. P. Kohl, S. McMahan, M. A. Hartmann, A. M. Williams, and J. Sekelsky, 2017 Bloom syndrome helicase promotes meiotic crossover patterning and homolog disjunction. *Curr Biol* **27**: 1–5.

Hawley, R. S., 1988 Exchange and chromosomal segregation in eucaryotes. In *Genetic Recombination*, edited by R. Kucherlapati and G. Smith, pp. 497–527, American Society of Microbiology, Washington, D.C.

Holsclaw, J. K. and J. Sekelsky, 2017 Annealing of complementary dna sequences during double-strand break repair in *drosophila* is mediated by the ortholog of *smarcal1*. *Genetics* **206**: 467–480.

Joyce, E. F., M. Pedersen, S. Tiong, S. K. White-Brown, A. Paul, S. D. Campbell, and K. S. McKim, 2011 *Drosophila atm* and *atr* have distinct activities in the regulation of meiotic dna damage and repair. *J Cell Biol* **195**: 359–67.

Keegan, K. S., D. A. Holtzman, A. W. Plug, E. R. Christenson, E. E. Brainerd, G. Flaggs, N. J. Bentley, E. M. Taylor, M. S. Meyn, S. B. Moss, A. M. Carr, T. Ashley, and M. F. Hoekstra, 1996 The *atr* and *atm* protein kinases associate with different sites along meiotically pairing chromosomes. *Genes Dev* **10**: 2423–37.

Kleckner, N., D. Zickler, G. H. Jones, J. Dekker, R. Padmore, J. Henle, and J. Hutchinson, 2004 A mechanical basis for chromosome function. *Proc Natl Acad Sci U S A* **101**: 12592–7.

Koehler, K. E., C. L. Boulton, H. E. Collins, R. L. French, K. C. Herman, S. M. Lacefield, L. D. Madden, C. D. Schuetz, and R. S. Hawley, 1996 Spontaneous x chromosome *mi* and *mii* nondisjunction events in *drosophila melanogaster* oocytes have different recombinational histories. *Nat Genet* **14**: 406–14.

Kohl, K. P., C. D. Jones, and J. Sekelsky, 2012 Evolution of an *mcm* complex in flies that promotes meiotic crossovers by blocking *blm* helicase. *Science* **338**: 1363–5.

Kohl, K. P. and J. Sekelsky, 2013 Meiotic and mitotic recombination in meiosis. *Genetics* **194**: 327–34.

LaRocque, J. R., B. Jaklevic, T. T. Su, and J. Sekelsky, 2007 *Drosophila atr* in double-strand break repair. *Genetics* **175**: 1023–33.

Laurençon, A., A. Purdy, J. Sekelsky, R. S. Hawley, and T. T. Su, 2003 Phenotypic analysis of separation-of-function alleles of *mei-41*, *drosophila atm/atr*. *Genetics* **164**: 589–601.

Liu, H., J. K. Jang, N. Kato, and K. S. McKim, 2002 *mei-p22* encodes a chromosome-associated protein required for the initiation of meiotic recombination in *drosophila melanogaster*.



- Genetics **162**: 245–58.
- Lu, X., X. Liu, L. An, W. Zhang, J. Sun, H. Pei, H. Meng, Y. Fan, and C. Zhang, 2008 The arabidopsis muts homolog atmsh5 is required for normal meiosis. *Cell Res* **18**: 589–99.
- Martini, E., R. L. Diaz, N. Hunter, and S. Keeney, 2006 Crossover homeostasis in yeast meiosis. *Cell* **126**: 285–95.
- Mather, K., 1939 Crossing over and heterochromatin in the x chromosome of drosophila melanogaster. *Genetics* **24**: 413–35.
- McKim, K. S., B. L. Green-Marroquin, J. J. Sekelsky, G. Chin, C. Steinberg, R. Khodosh, and R. S. Hawley, 1998 Meiotic synapsis in the absence of recombination. *Science* **279**: 876–8.
- McKim, K. S., J. K. Jang, W. E. Theurkauf, and R. S. Hawley, 1993 Mechanical basis of meiotic metaphase arrest. *Nature* **362**: 364–6.
- McVey, M., S. L. Andersen, Y. Broze, and J. Sekelsky, 2007 Multiple functions of drosophila blm helicase in maintenance of genome stability. *Genetics* **176**: 1979–1992.
- Miller, D. E., C. B. Smith, N. Yeganeh Kazemi, A. J. Cockrell, A. V. Arvanitakis, J. P. Blumenstiel, S. L. Jaspersen, and R. S. Hawley, 2016 Whole-genome analysis of individual meiotic events in drosophila melanogaster reveals that noncrossover gene conversions are insensitive to interference and the centromere effect. *Genetics* **203**: 159–71.
- Owen, A. R. G., 1949 A possible interpretation of the apparent interference across the centromere found by callan and montalenti in culex pipiens. *Heredity (Edinb)* **3**: 357–67.
- Redfield, H., 1932 A comparison of triploid and diploid crossing over for chromosome ii of drosophila melanogaster. *Genetics* **17**: 137–52.
- Robert, T., A. Nore, C. Brun, C. Maffre, B. Crimi, H. M. Bourbon, and B. de Massy, 2016 The topovib-like protein family is required for meiotic dna double-strand break formation. *Science* **351**: 943–9.
- Sanghavi, P., S. Laxani, X. Li, S. L. Bullock, and G. B. Gonsalvez, 2013 Dynein associates with oskar mrnps and is required for their efficient net plus-end localization in drosophila oocytes. *PLoS One* **8**: e80605.
- Sibon, O. C., A. Laurençon, R. Hawley, and W. E. Theurkauf, 1999 The drosophila atm homologue mei-41 has an essential checkpoint function at the midblastula transition. *Curr Biol* **9**: 302–12.
- Stevens, W. L., 1936 The analysis of interference. *J Genet* **32**: 51–64.
- Sturtevant, A. H., 1913 The linear arrangement of six sex-linked factors in drosophila, as shown by their mode of association. *J Exp Biol* **14**: 43–59.
- Sturtevant, A. H., 1951 A map of the fourth chromosome of drosophila melanogaster, based on crossing over in triploid females. *Proc Natl Acad Sci U S A* **37**: 405–407.
- Trowbridge, K., K. McKim, S. Brill, and J. Sekelsky, 2007 Synthetic lethality in the absence of the drosophila mus81 endonuclease and the dmbm helicase is associated with elevated apoptosis. *Genetics* **176**: 1993–2001.
- Wang, S., D. Zickler, N. Kleckner, and L. Zhang, 2015 Meiotic crossover patterns: Obligatory crossover, interference and homeostasis in a single process. *Cell Cycle* **14**: 305–14.
- Weinstein, A., 1936 The theory of multiple-strand crossing over. *Genetics* **21**: 155–199.
- Weinstein, A., 1958 The geometry and mechanics of crossing over. *Cold Spring Harb Symp Quant Biol* **23**: 177–96.
- Zhang, L., Z. Liang, J. Hutchinson, and N. Kleckner, 2014 Crossover patterning by the beam-film model: analysis and

implications. *PLoS Genet* **10**: e1004042.



**Supplemental Table S1. Progeny counts from crossover distribution experiments.**

|          | Progeny                          |            |           |           |             |              | Maternal Genotype |                             |                                               |
|----------|----------------------------------|------------|-----------|-----------|-------------|--------------|-------------------|-----------------------------|-----------------------------------------------|
|          |                                  |            |           |           |             |              | WT                | <i>mei-41<sup>29D</sup></i> | <i>mei-9<sup>o</sup> mei-41<sup>29D</sup></i> |
| Parental | +                                | +          | +         | +         | +           | +            | 2376              | 3698                        | 496                                           |
|          | <i>net-cn</i>                    | <i>net</i> | <i>ho</i> | <i>dp</i> | <i>b</i>    | <i>pr cn</i> |                   | 2969                        | 408                                           |
| SCO      | 1a ( <i>net<sup>+</sup>-ho</i> ) | +          | <i>ho</i> | <i>dp</i> | <i>b</i>    | <i>pr cn</i> | 176               | 16                          | 7                                             |
|          | 1b ( <i>net-ho<sup>+</sup></i> ) | <i>net</i> | +         | +         | +           | +            |                   | 71                          | 15                                            |
|          | 2a ( <i>ho<sup>+</sup>-dp</i> )  | +          | +         | <i>dp</i> | <i>b</i>    | <i>pr cn</i> | 290               | 45                          | 1                                             |
|          | 2b ( <i>ho-dp<sup>+</sup></i> )  | <i>net</i> | <i>ho</i> | +         | +           | +            |                   | 74                          | 4                                             |
|          | 3a ( <i>dp<sup>+</sup>-b</i> )   | +          | +         | +         | <i>b</i>    | <i>pr cn</i> | 1099              | 274                         | 25                                            |
|          | 3b ( <i>dp-b<sup>+</sup></i> )   | <i>net</i> | <i>ho</i> | <i>dp</i> | +           | +            |                   | 256                         | 44                                            |
|          | 4a ( <i>b<sup>+</sup>-pr</i> )   | +          | +         | +         | +           | <i>pr cn</i> | 154               | 117                         | 14                                            |
|          | 4b ( <i>b-pr<sup>+</sup></i> )   | <i>net</i> | <i>ho</i> | <i>dp</i> | <i>b</i>    | +            |                   | 169                         | 25                                            |
|          | 5a ( <i>pr<sup>+</sup>-cn</i> )  | +          | +         | +         | +           | <i>cn</i>    | 39                | 44                          | 5                                             |
|          | 5b ( <i>pr-cn<sup>+</sup></i> )  | <i>net</i> | <i>ho</i> | <i>dp</i> | <i>b</i>    | <i>pr</i> +  |                   | 27                          | 6                                             |
| DCO      | 1a-2b                            | +          | <i>ho</i> | +         | +           | +            | 1                 | 1                           | 1                                             |
|          | 1b-2a                            | <i>net</i> | +         | <i>dp</i> | <i>b</i>    | <i>pr cn</i> |                   | 2                           | 2                                             |
|          | 1a-3b                            | +          | <i>ho</i> | <i>dp</i> | +           | +            | 11                | 0                           | 0                                             |
|          | 1b-3a                            | <i>net</i> | +         | +         | <i>b</i>    | <i>pr cn</i> |                   | 6                           | 0                                             |
|          | 1a-4b                            | +          | <i>ho</i> | <i>dp</i> | <i>b</i>    | +            | 10                | 0                           | 0                                             |
|          | 1b-4a                            | <i>net</i> | +         | +         | +           | <i>pr cn</i> |                   | 4                           | 0                                             |
|          | 1a-5b                            | +          | <i>ho</i> | <i>dp</i> | <i>b</i>    | <i>pr</i> +  | 2                 | 0                           | 0                                             |
|          | 1b-5a                            | <i>net</i> | +         | +         | +           | <i>cn</i>    |                   | 1                           | 0                                             |
|          | 2a-3b                            | +          | +         | <i>dp</i> | +           | +            | 6                 | 1                           | 0                                             |
|          | 2b-3a                            | <i>net</i> | <i>ho</i> | +         | <i>b</i>    | <i>pr cn</i> |                   | 6                           | 2                                             |
|          | 2a-4b                            | +          | +         | <i>dp</i> | <i>b</i>    | +            | 7                 | 1                           | 0                                             |
|          | 2b-4a                            | <i>net</i> | <i>ho</i> | +         | +           | <i>pr cn</i> |                   | 1                           | 1                                             |
|          | 2a-5b                            | +          | +         | <i>dp</i> | <i>b</i>    | <i>pr</i> +  | 13                | 0                           | 0                                             |
|          | 2b-5a                            | <i>net</i> | <i>ho</i> | +         | +           | <i>cn</i>    |                   | 2                           | 0                                             |
|          | 3a-4b                            | +          | +         | +         | <i>b</i>    | +            | 19                | 7                           | 0                                             |
|          | 3b-4a                            | <i>net</i> | <i>ho</i> | <i>dp</i> | +           | <i>pr cn</i> |                   | 1                           | 0                                             |
|          | 3a-5b                            | +          | +         | +         | <i>b</i>    | <i>pr</i> +  | 17                | 3                           | 0                                             |
|          | 3b-5a                            | <i>net</i> | <i>ho</i> | <i>dp</i> | +           | <i>cn</i>    |                   | 3                           | 1                                             |
| 4a-5b    | +                                | +          | +         | +         | <i>pr</i> + | 2            | 2                 | 1                           |                                               |
| 4b-5a    | <i>net</i>                       | <i>ho</i>  | <i>dp</i> | <i>b</i>  | +           |              | 0                 | 0                           |                                               |
| TCO      | 1b-2a-4b                         | <i>net</i> | +         | <i>dp</i> | <i>b</i>    | +            | 0                 | 0                           | 1                                             |
| <i>n</i> |                                  |            |           |           |             |              | 4222              | 7801                        | 1059                                          |

SCO = single crossover; DCO = double crossover; TCO = triple crossover

**Supplementary Table S2. Progeny counts from interference experiment**

| Progeny Class    | Progeny Genotype     | Maternal Genotype |                             |
|------------------|----------------------|-------------------|-----------------------------|
|                  |                      | <i>wild type</i>  | <i>mei-41<sup>29D</sup></i> |
| Parental         | + + +                | 1510              | 5200                        |
|                  | <i>dp Sp b</i>       | 1897              | 3686                        |
| Single Crossover | + <i>Sp b</i>        | 172               | 195                         |
|                  | <i>dp</i> + +        | 144               | 164                         |
|                  | + + <i>b</i>         | 344               | 272                         |
|                  | <i>dp Sp</i> +       | 258               | 297                         |
| Double Crossover | + <i>Sp</i> +        | 4                 | 17                          |
|                  | <i>dp</i> + <i>b</i> | 1                 | 5                           |
| Total <i>n</i>   |                      | 3330              | 9836                        |

**Supplemental Table 3. X nondisjunction rates for *mei-41* mutants.**

| Maternal Genotype                                      | Normal Progeny | XO NDJ Males | XXY NDJ Females | X NDJ (%) |
|--------------------------------------------------------|----------------|--------------|-----------------|-----------|
| <i>mei-41</i> <sup>1</sup>                             | 815            | 24           | 15              | 8.7       |
| <i>mei-41</i> <sup>29D</sup>                           | 3791           | 144          | 155             | 13.6      |
| <i>mei-9</i> <sup>a</sup> <i>mei-41</i> <sup>29D</sup> | 499            | 27           | 20              | 15.9      |

Refer to Materials and Methods for details regarding progeny classes.
